# Supplementary material for: CMYA5 establishes cardiac dyad architecture and positioning
Source: PubMed Central journal article supplement (PMC9023524; doi:10.1038/s41467-022-29902-4), 2022-04-21
Supplement: 41467_2022_29902_MOESM1_ESM.pdf [file 41467_2022_29902_MOESM1_ESM.pdf]

**Supplementary Information:  
CMYA5 establishes cardiac dyad architecture positioning**

Lu F, Ma Q, Xie W, Liou CL, Zhang D, Sweat ME, Jardin BD, Naya FJ, Guo Y, Cheng H, Pu WT

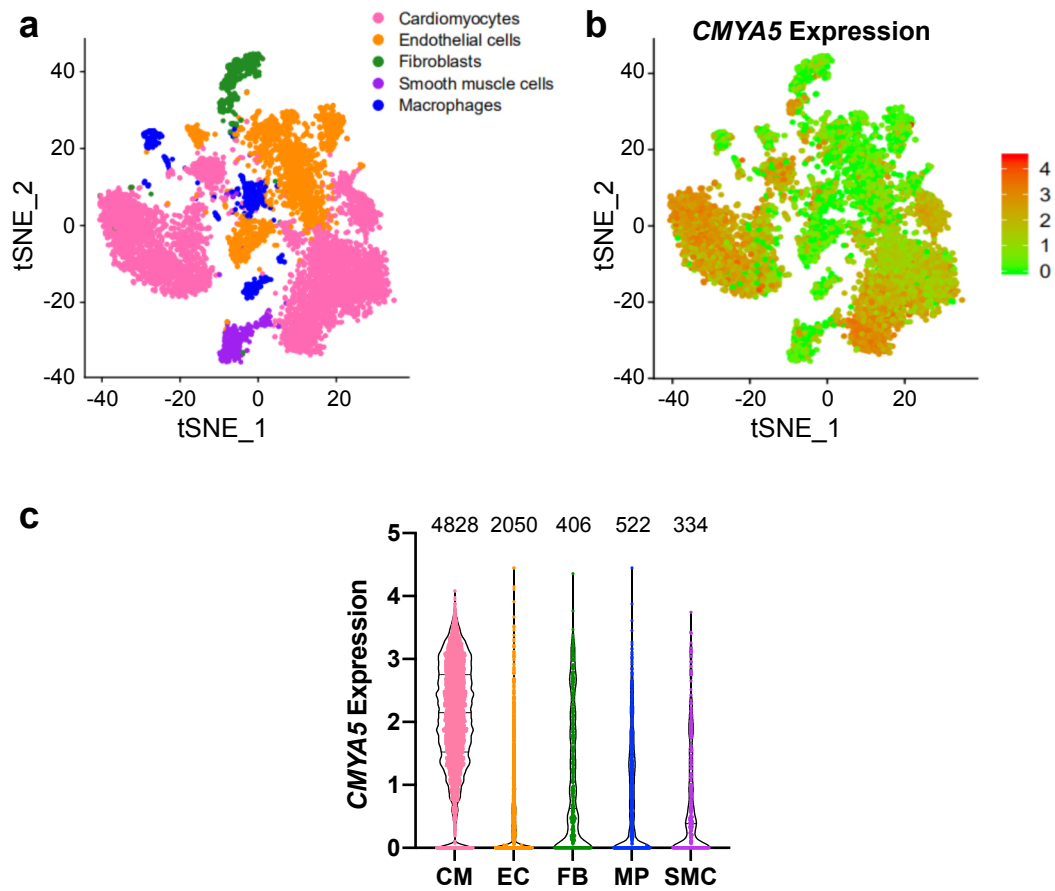

**Supplementary Figure 1. Cardiac expression of *CMYA5*.** Single cell RNA-seq of human heart from GSE109816. **a.** tSNE clustering of cardiac cells. Cardiomyocytes are shown in pink. **b.** *CMYA5* expression mapped onto tSNE clusters. **c.** Violin plot of *CMYA5* expression in major cardiac cell types, showing selective expression in cardiomyocytes (CM). EC, endothelial cell. FB, fibroblast. MP, macrophage. SMC, smooth muscle cells.

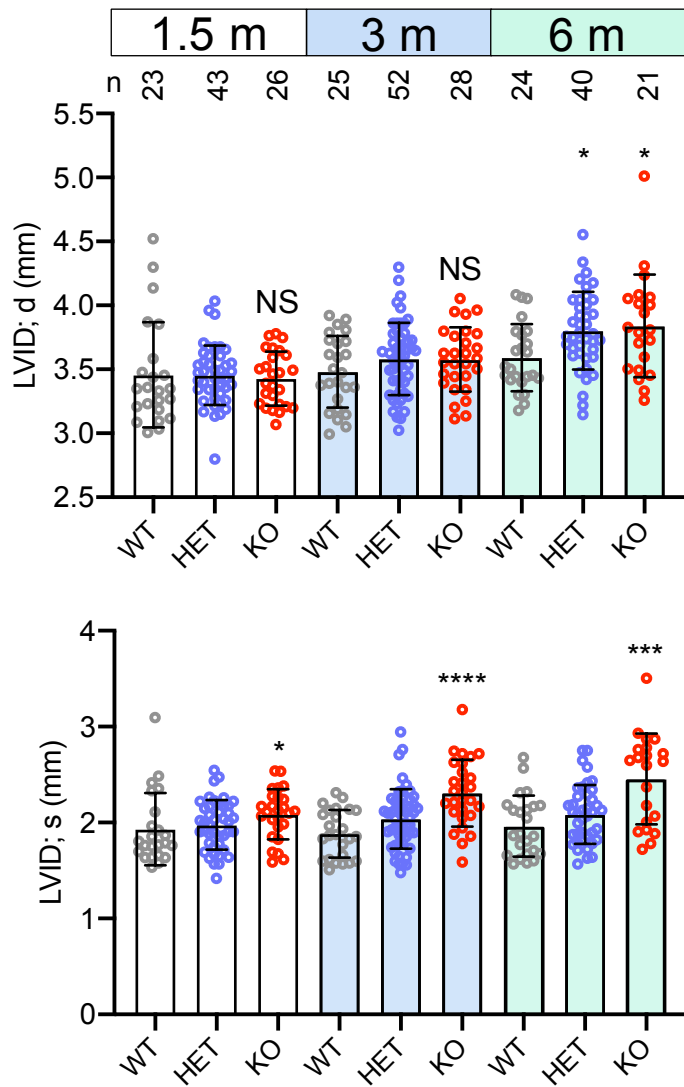

**Supplementary Figure 2. Progressive left ventricular dilatation in *Cmya5* KO.**

Left ventricular internal diameter was measured in diastole (LVID;d) or systole (LVID;s). There was progressive LV dilatation in *Cmya5* KO but not *Cmya5* Het. Kruskal-Wallis with Dunn's multiple comparison test vs. WT at the same time point. \*, P<0.05; \*\*, P<0.01; \*\*\*\*, P<0.0001.

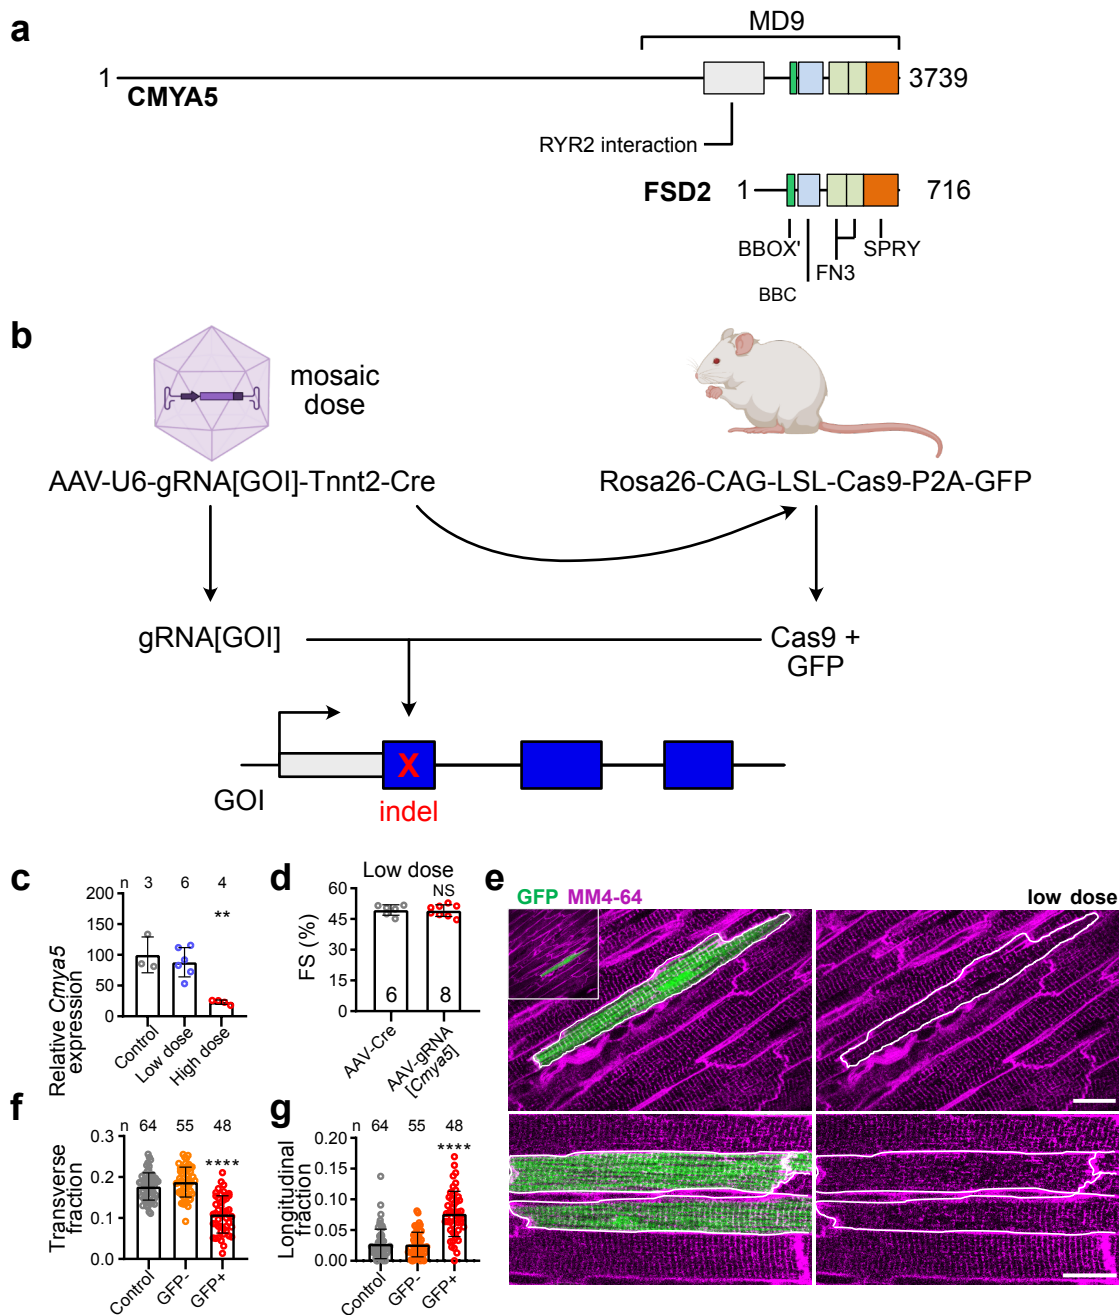

### Supplementary Figure 3. *CMYA5* is required cell autonomously for T-tubule maintenance.

**a.** Schematic diagram of *CMYA5* and *FSD2* domain structure. Annotated domains are shown as rectangles. The C-terminus of *CMYA5* is closely related in sequence, domains, and domain order to *FSD2*. The C-terminal region of *CMYA5* named MD9 contains all the known interactions between *CMYA5* and other proteins. **b.** CASAASV somatic mutagenesis strategy. AAV that expresses cardiomyocyte specific Cre and guide RNA targeting a mouse gene is delivered to Rosa26-fsCas9-GFP mice. GFP marks Cas9 expressing cells. Cas9 in combination with gRNA generates indels in target genes and thereby inactivates them. Artwork from biorender.com. **c-g.** CASAASV targeting *Cmya5* was used to inactivate *Cmya5* in most cardiomyocytes (high dose, 5.5E10 vg/g) or in a low fraction of cardiomyocytes (low dose, 1E10 vg/g). The high dose strongly reduced *Cmya5* mRNA, whereas low dose did not significantly change *Cmya5* mRNA (c; ANOVA with Dunnett's multiple comparison test vs. control). Low dose CASAASV-gRNA[*Cmya5*] did not affect heart systolic function (d; *t*-test). Low dose CASAASV-gRNA[*Cmya5*] transduced cells (GFP+, white outline) had disorganized T-tubules (MM4-64 staining). Quantification of T-tubule staining in GFP+ cells after low dose CASAASV-gRNA[*Cmya5*] showed reduced transverse and increased longitudinal T-tubule fraction (f-g; Kruskal-Wallis with Dunn's multiple comparison test vs. control). Bar, 20  $\mu$ m. Images in e are representative of the 48-64 cardiomyocytes quantified in f-g.

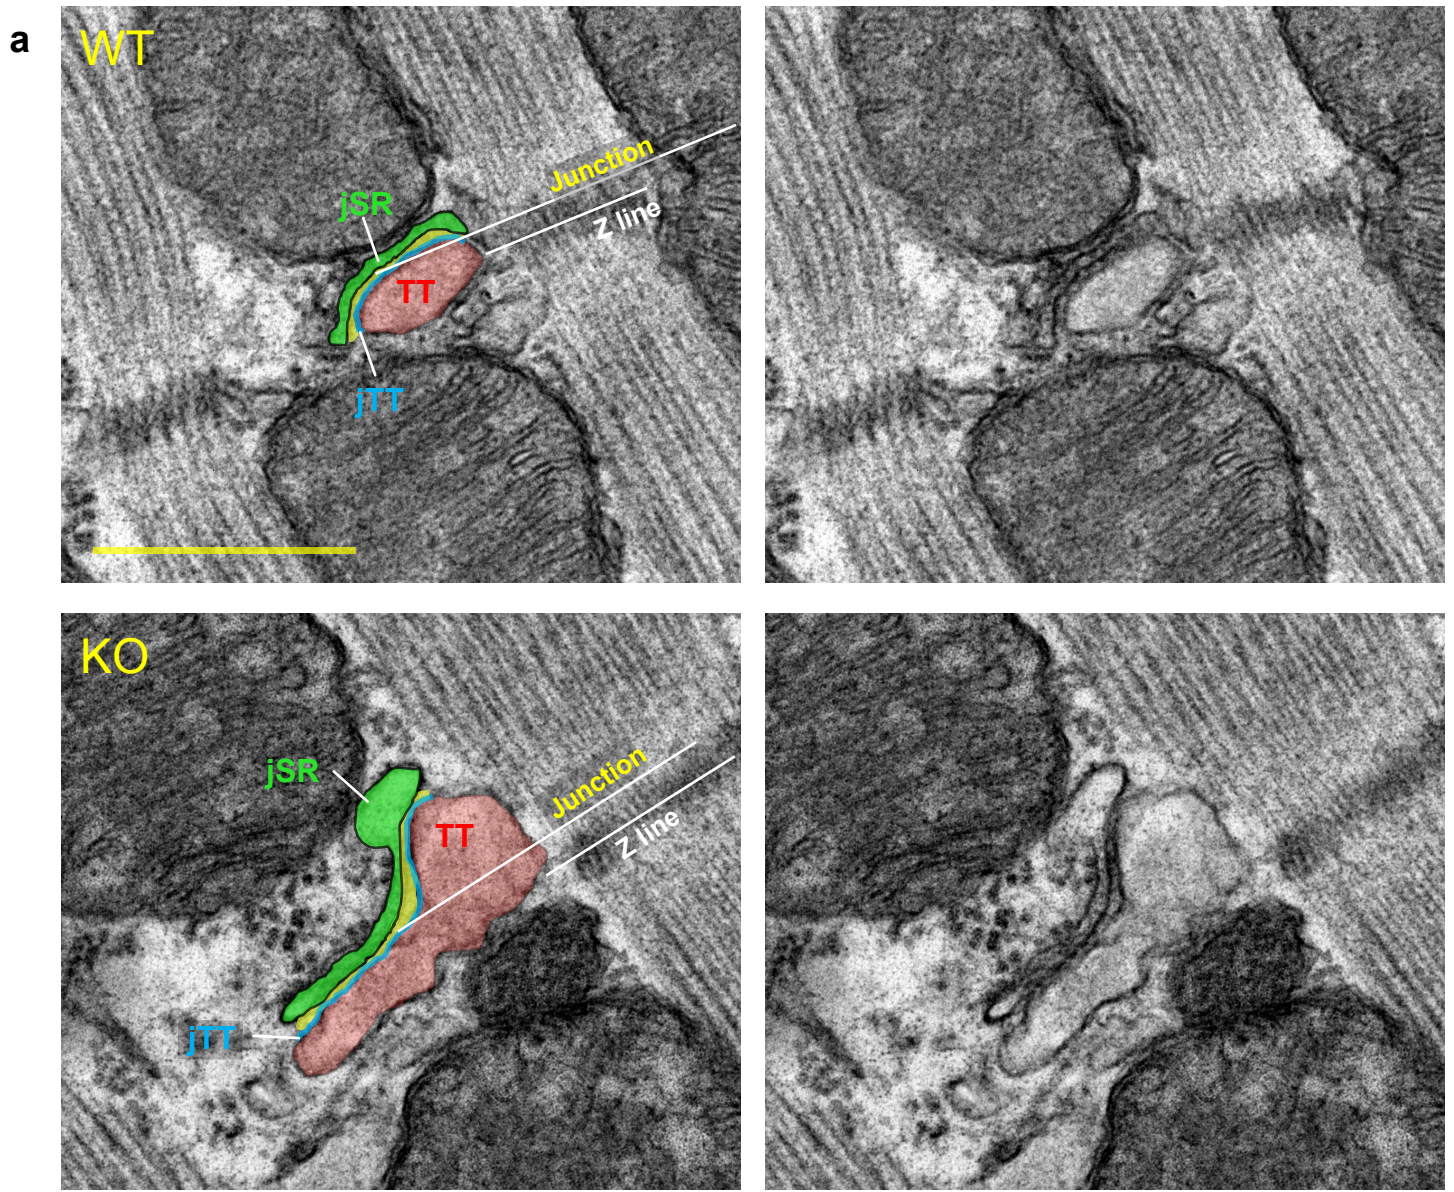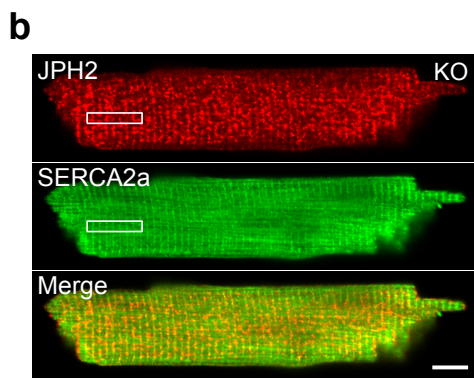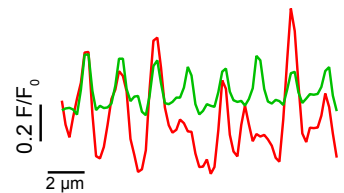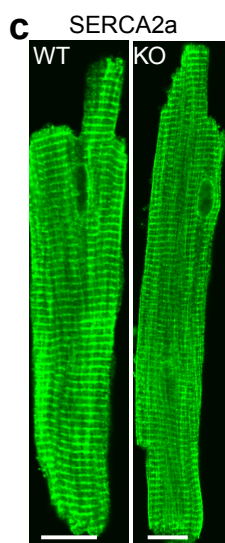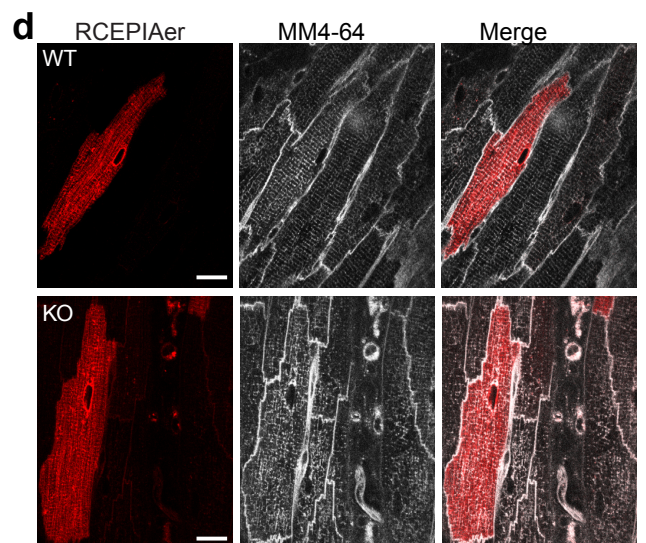

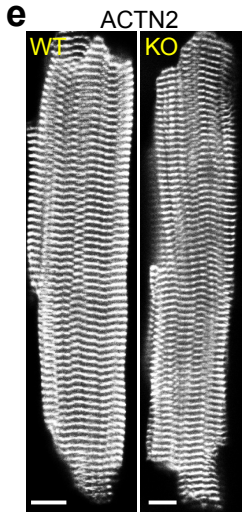

**Supplementary Figure 4. Impact of *Cmya5* KO on jSR, T-tubule, and ER organization. a.** Transmission electron microscopy, demonstrating dyad architecture. Image on the right is shown with labels to the left. T-tubule (TT), junctional SR, (jSR), and junctional cleft (Junction; the ~12 nm gap between T-tubules and jSR) are shaded red, green, and yellow, respectively. Circularity is calculated as  $4 * \pi * (\text{area}/\text{perimeter}^2)$ . jTT, T-tubule boundary that abuts a junctional cleft. Coupling ratio is the jTT length divided by the TT perimeter. Junction-Z line distance is the length between the center of a junctional cleft and its adjacent Z-line, marked in the figure by white lines. Bar = 500 nm. **b.** Relationship of SERCA2a (ER) and jSR (JPH2) localization in KO cardiomyocytes. Boxed regions are enlarged to the right with plot of signals below. Bar = 10  $\mu\text{m}$ . **c-d.** *Cmya5* KO did not impact overall localization of ER, marked by SERCA2a (c) or AAV-mediated expression of ER-localized fluorescent protein RCEPIAer (d). However, localization of MM4-64, marking T-tubules, was disrupted in KO. Bar = 15  $\mu\text{m}$ . **e.** Localization of ACTN2, marking Z-lines, was not altered by *Cmya5* KO. Bar = 10  $\mu\text{m}$ . Images in a-e are representative of 3 independent experiments.

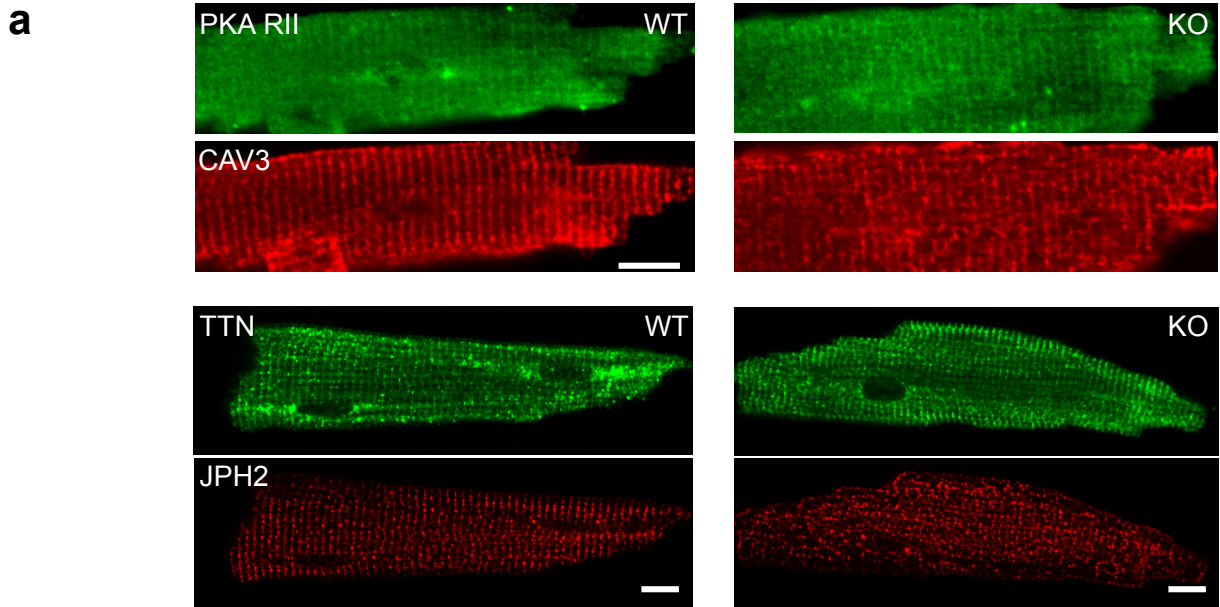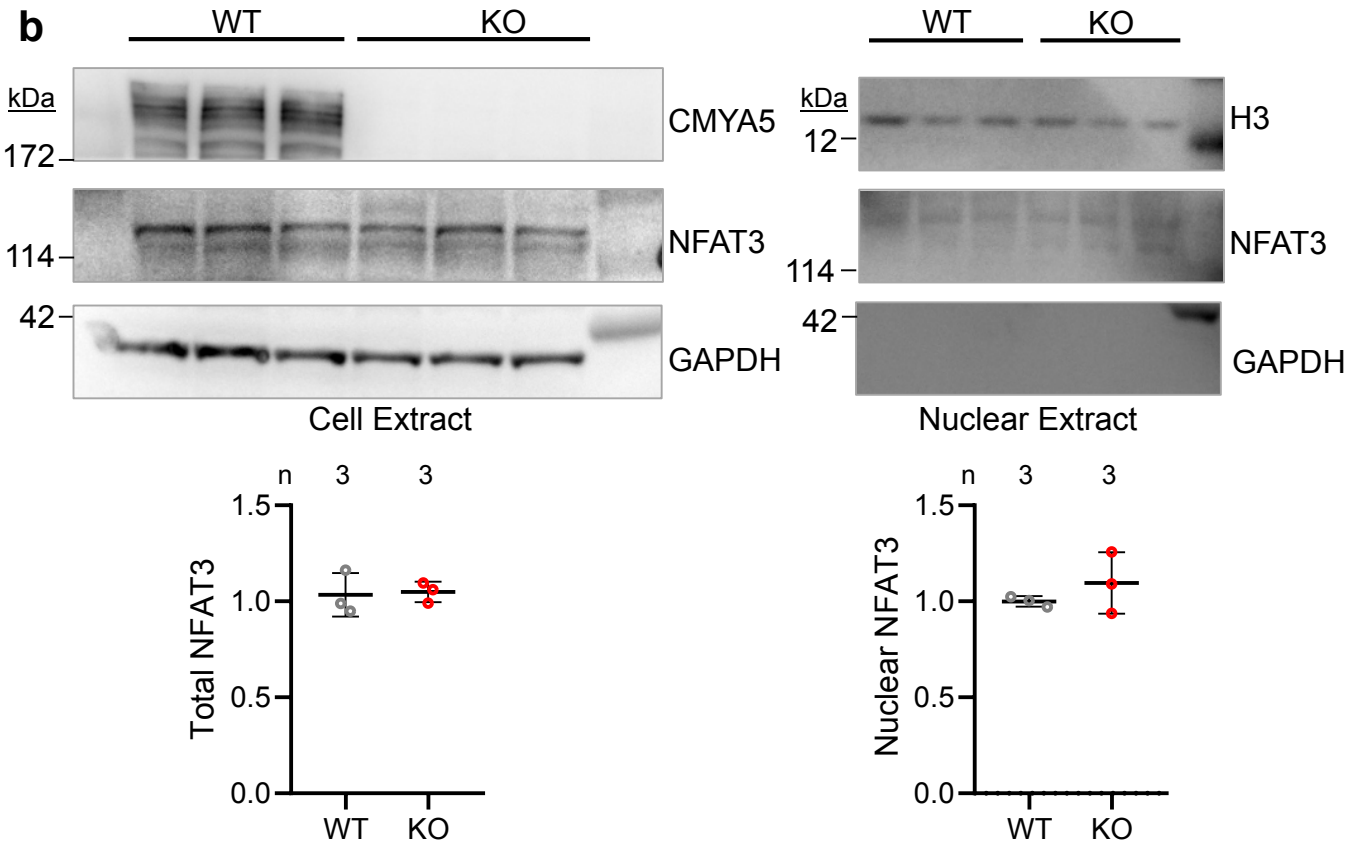

Suppl. Fig. 5, continued on next page.

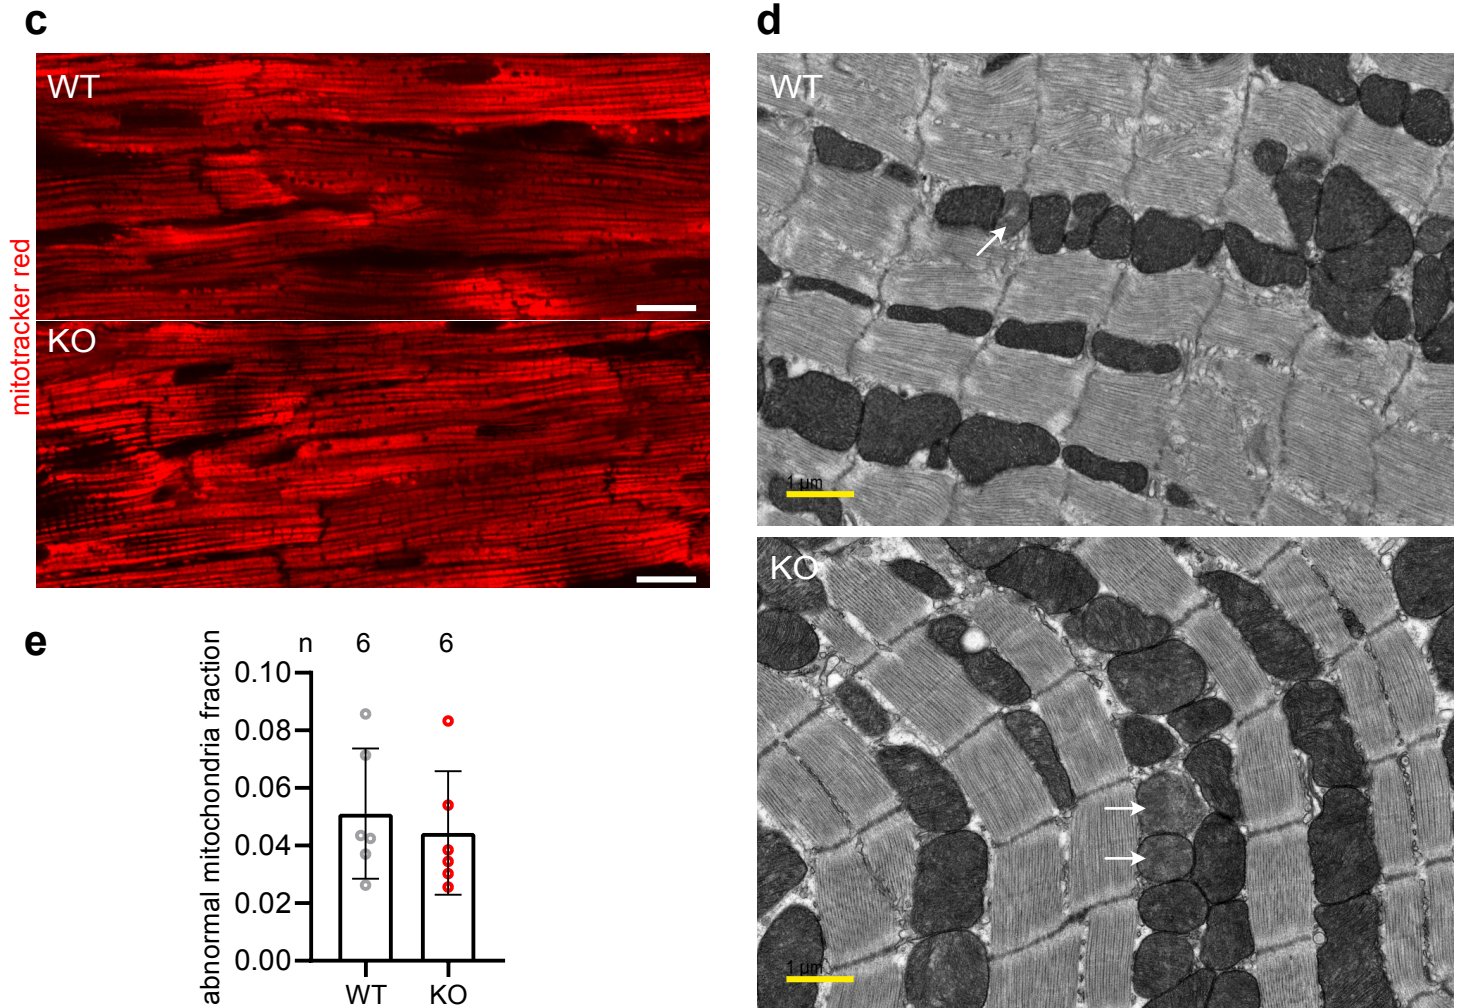

**Supplementary Figure 5. Additional characterization of *Cmya5* KO cardiomyocytes.** **a.** *Cmya5* WT and KO isolated adult cardiomyocytes immunostained for PKA subunit RIIA, T-tubule marker CAV3, TTN, or jSR marker JPH2. PKA and TTN localization were not disrupted in *Cmya5* KO cardiomyocytes. Bar = 10  $\mu$ m. Representative of 3 independent experiments. **b.** Nuclear localization of NFAT3, a downstream target of PKA-CN signaling. Cell and nuclear extracts were prepared from control and *Cmya5* KO heart ventricles at 3 months of age. Proteins were detected by western blotting. We did not detect alteration of total or nuclear NFAT3 in *Cmya5* KO hearts. **c-e.** Mitochondrial organization and morphology in *Cmya5* WT and KO hearts. Freshly isolated hearts were perfused with mitotracker red and imaged using a confocal microscope (c). Overall mitochondrial organization was similar between genotypes. Bar = 10  $\mu$ m. Transmission electron microscopy (d) likewise did not detect a difference in mitochondrial morphology between genotypes. Bar = 1  $\mu$ m. Arrows point to examples of mitochondria classified as abnormal. Quantification of the fraction of abnormal mitochondria in transmission electron micrographs did not detect a difference between genotypes (e). Two images from each of three animals were quantified. Data are presented as mean  $\pm$  SD.



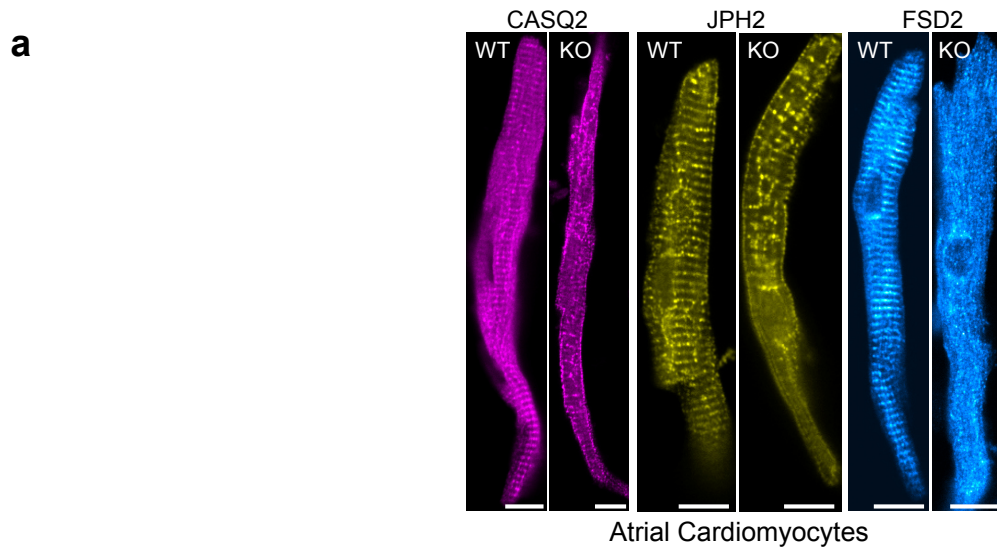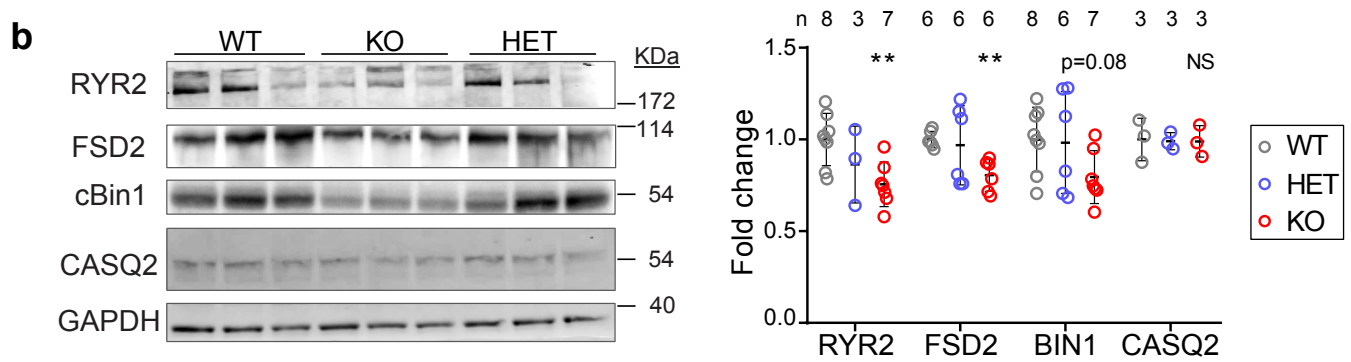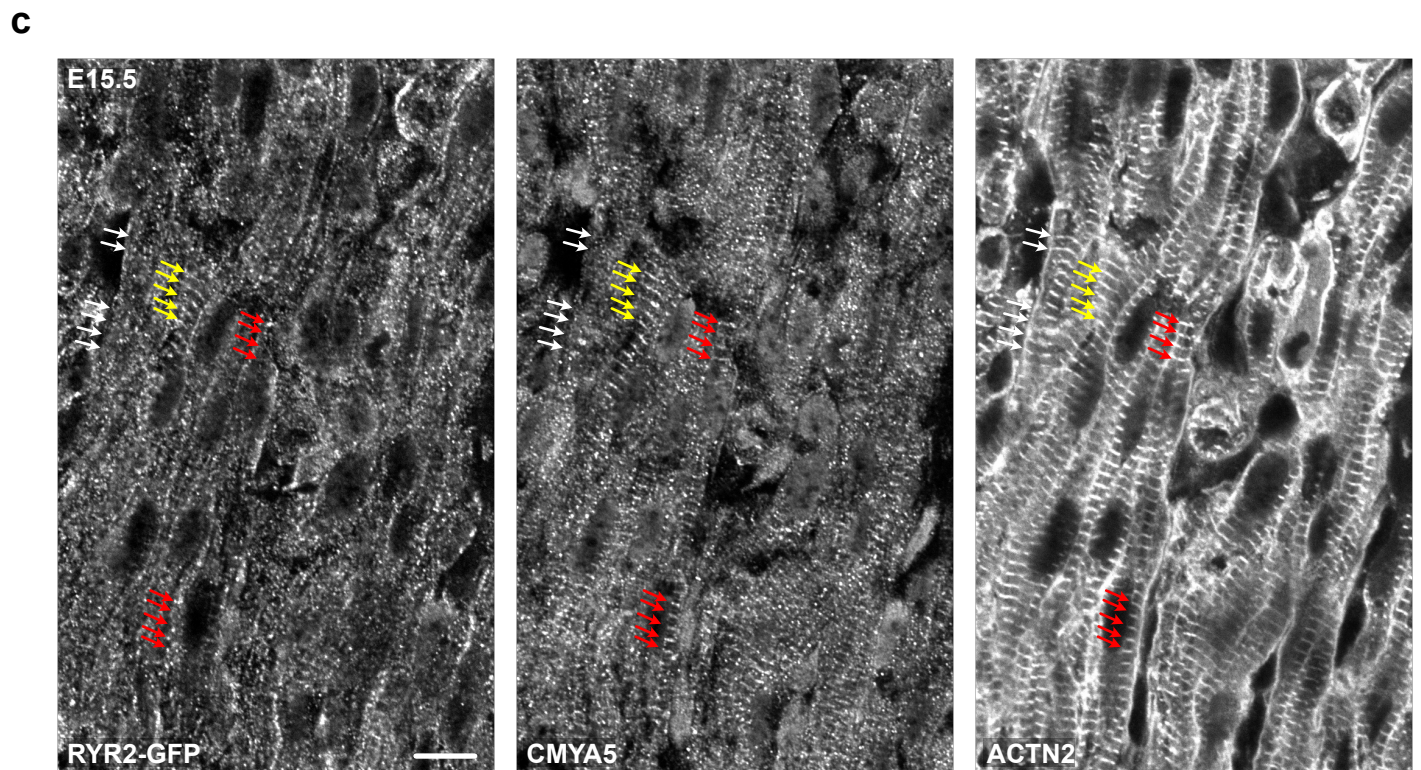

Suppl. Fig. 6. (continued on next page)

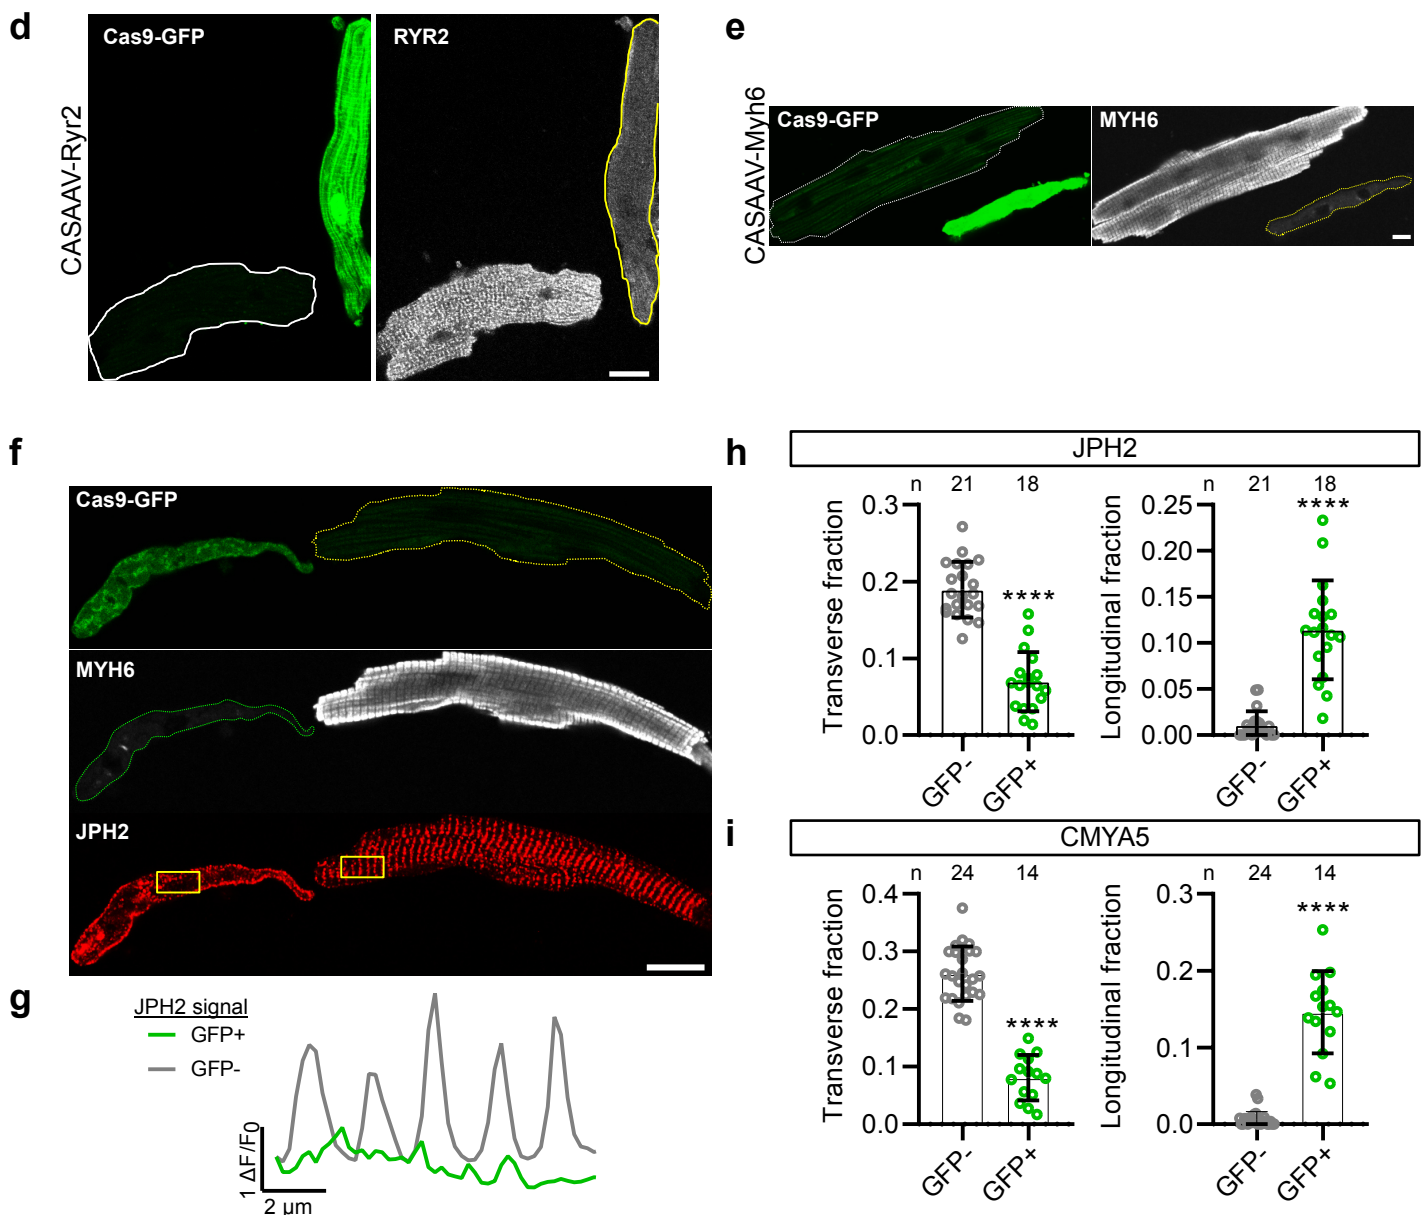

**Supplementary Figure 6. Hierarchical relationship of CMYA5, sarcomeres, jSR, and T-tubules.** **a.** Mature atrial cardiomyocytes immunostained for CASQ2, JPH2, and FSD2. Bar, 10  $\mu\text{m}$ . Representative of 4 independent experiments. **b.** Western blot measuring the effect of *Cmya5* knockout or heterozygous mutation on protein levels of jSR (RYR2, FSD2, CASQ2) and T-tubule (cBIN1) components in 3 month-old heart lysates. Western quantification is shown to the right. ANOVA with Dunnett's multiple comparison test vs. WT. **c.** E15.5 ventricular myocardial sections from RYR2-GFP embryos, stained for GFP, CMYA5, or ACTN2. White arrows, ACTN2 without co-localized CMYA5 or RYR2-GFP; yellow arrows, Bar, 10  $\mu\text{m}$ . Representative of 4 independent experiments. **d.** Validation of CASA AV somatic mutagenesis depletion of RYR2 in GFP+ cardiomyocytes. See also Guo et al., *Circ. Res.*, 2017. Representative of 3 independent experiments. **e.** Validation of CASA AV depletion of MYH6 in GFP+ cardiomyocytes. See also Guo et al., *Nat. Commun.*, 2018. Representative of 3 independent experiments. **f-i.** Quantification of jSR organization in cardiomyocytes after CASA AV-Myh6 treatment. JPH2 signal in boxed regions in (f) is plotted in (g). Quantification of T-tubule organization based on JPH2 signal. Mann-Whitney test. n, number of cardiomyocytes. **h.** Quantification of CMYA5 organization in cardiomyocytes after CASA AV-Myh6 treatment. Mann-Whitney test. Data are presented as mean  $\pm$  SD. NS, not significant. \*\*,  $P < 0.01$ ; \*\*\*\*,  $P < 0.0001$ .

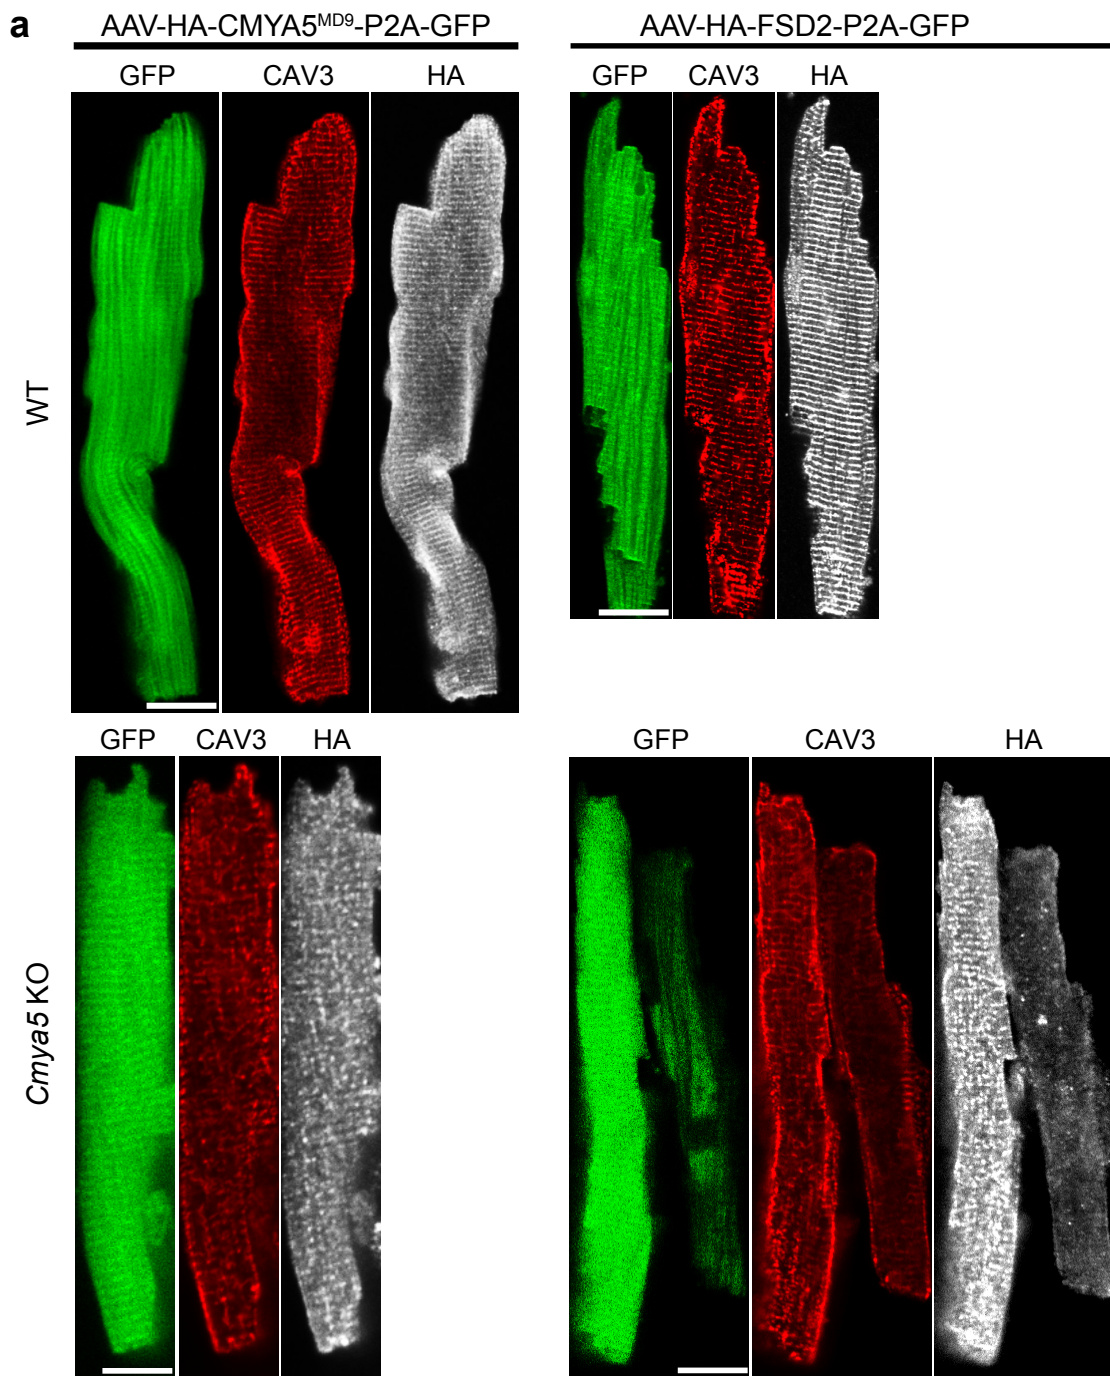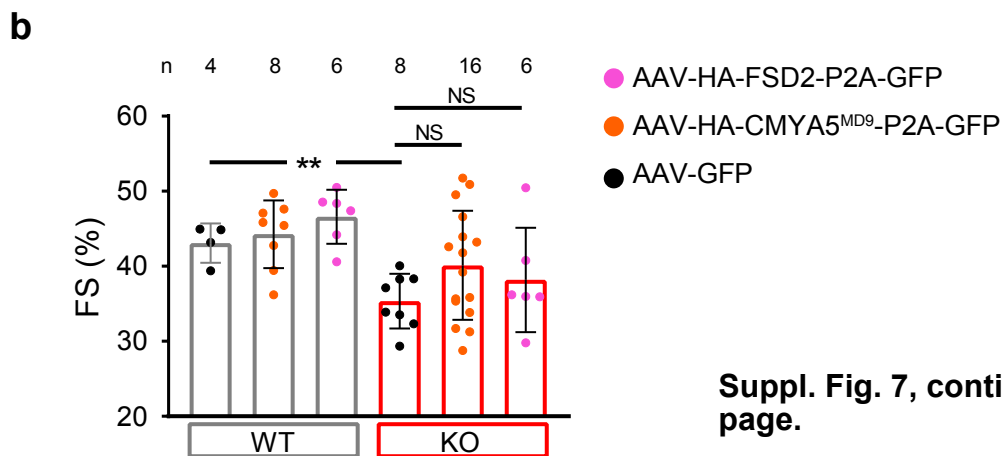

Suppl. Fig. 7, continued on next page.

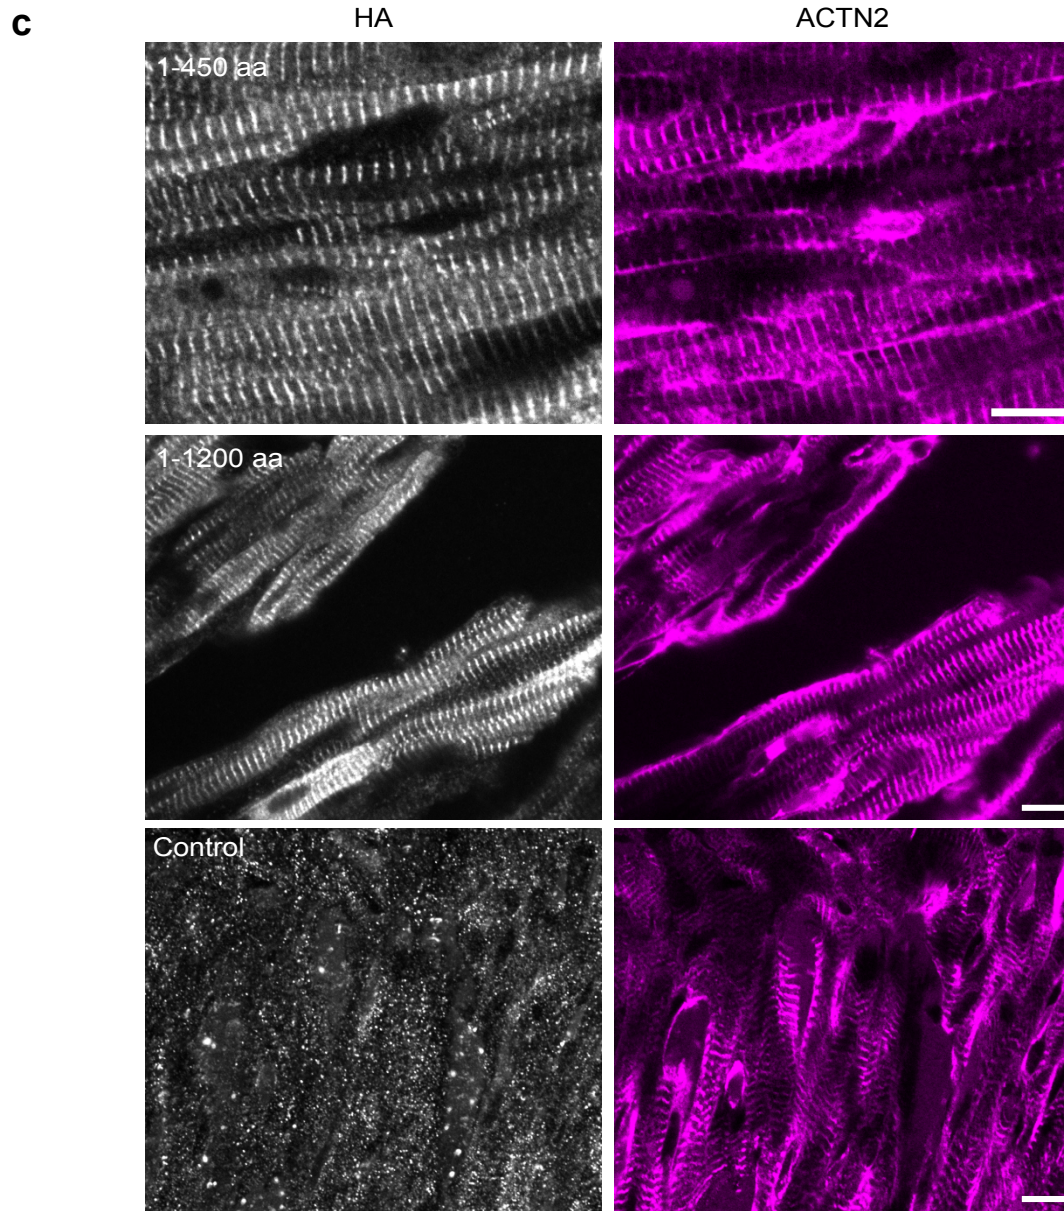

**Supplementary Figure 7. CMYA5<sup>MD9</sup> and FSD2 failed to complement *Cmya5* knockout.** The MD9 fragment of CMYA5 (CMYA5<sup>MD9</sup>) or FSD2 were expressed in *Cmya5* knockout or control hearts using AAV9 and the cardiac troponin T promoter. **a.** CMYA5<sup>MD9</sup> and FSD2 localized in a striated pattern and co-localized with T-tubules in WT. CMYA5<sup>MD9</sup> and FSD2 did not localize normally in *Cmya5* KO, and they did not rescue their T-tubule defects. Bar, 20  $\mu$ m. Representative of 4 independent experiments. **b.** The contractile defect of *Cmya5* KO hearts was not rescued by CMYA5<sup>MD9</sup> or FSD2 overexpression. ANOVA with Dunnett's multiple comparison test vs control treatment within each genotype. \*\*,  $P < 0.01$ . NS, not significant. Data are presented as mean  $\pm$  SD. **c.** Localization of CMYA5 N-terminal fragments in cardiomyocytes in vivo. AAV that expressed HA-CMYA5[1-450] or HA-CMYA5[1-1200] were administered to newborn mice. Distribution of HA-tagged proteins was determined by immunostaining at P7 and compared to ACTN2 staining of Z-lines. Bar = 10  $\mu$ m. Representative of 4 independent experiments.

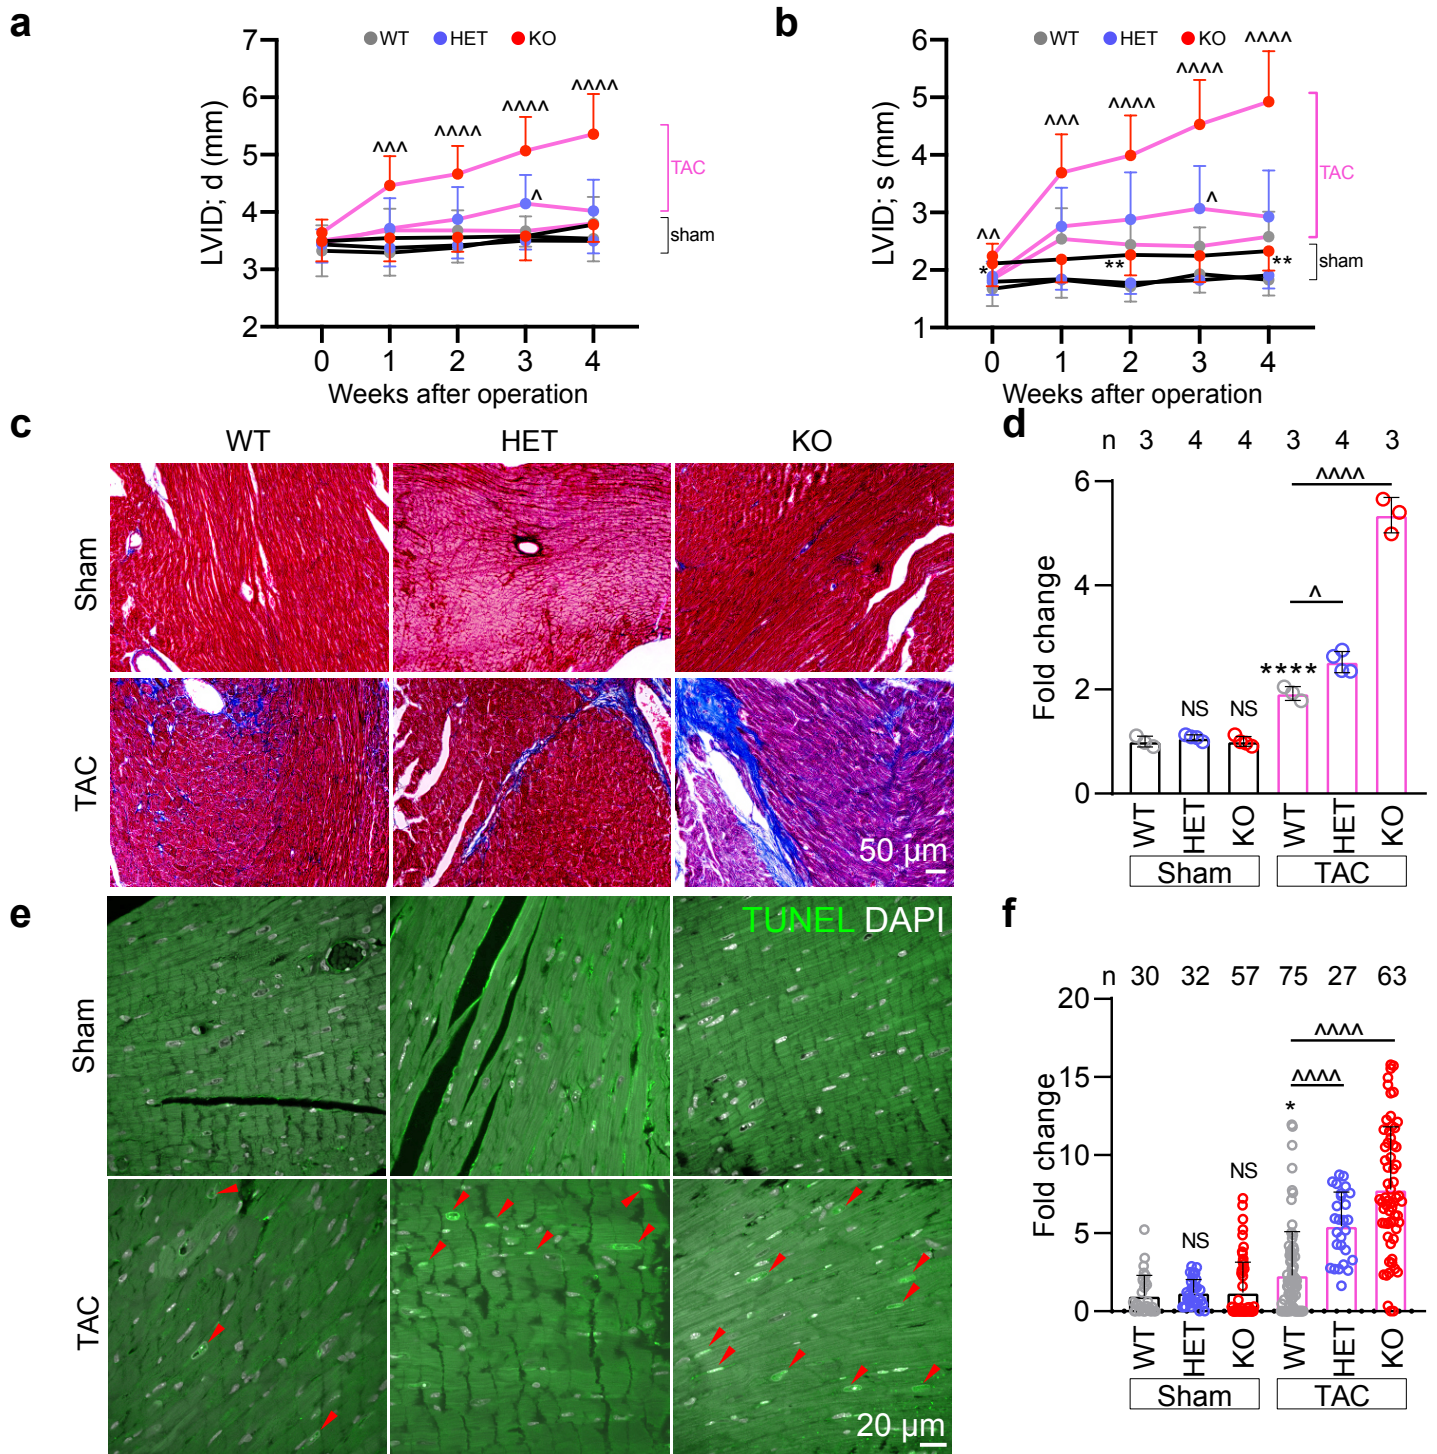

**Supplementary Figure 8. Cardiac remodeling, fibrosis, and apoptosis in *Cmya5* KO under pressure overload.** **a-b.** Cardiac remodeling caused by *Cmya5* KO and TAC. Left ventricular dimensions were measured by echocardiography at the indicated time points after TAC or Sham surgery. *Cmya5* KO mice developed LV dilatation. Repeated measures two-way ANOVA with Dunnett's multiple comparisons test vs. WT within sham (\*) or TAC (^) groups. n=5 mice per group. **c-d.** Cardiac fibrosis in *Cmya5* KO. Heart sections were stained with Masson's trichrome. Blue staining indicates fibrotic tissue. d, Fold-change in the area of myocardial sections occupied by fibrotic tissue. ANOVA with Dunnett's multiple comparison test versus WT-Sham (\*) or WT-TAC (^). n, number of mice. One short axis section through the ventricles was analyzed per animal. Representative of 3 to 4 independent experiments. **e-f.** TUNEL staining of myocardial sections. Red arrowheads point out examples of apoptotic cells. f, Fold-change in the number of apoptotic cells per field. Kruskal-Wallis with Dunn's multiple comparison test versus WT-Sham (\*) or WT-TAC (^). n, number of fields. Representative of at least 10 fields were analyzed per mouse. NS, not significant. \* or ^, P<0.05. \*\* or ^^, P<0.01. ^^, P<0.001. \*\*\*\* or ^^, P<0.0001. Data are presented as mean  $\pm$  SD.

**Supplementary Table 1. Oligonucleotides used in this study**

| <b>Genotyping primers</b>  |                          |                            |                          |
|----------------------------|--------------------------|----------------------------|--------------------------|
| <b>Genotype</b>            | <b>primer1</b>           | <b>primer2</b>             | <b>common primer</b>     |
| <i>Cmya5</i> $\Delta$      | AGGCTTCACCTTGCTTTGATAG   | TGTGAAAGCAAACCCAATATC      | TTCACCATAGGTTATCAGATGAGG |
| <i>RosaCas9gfp/Cas9gfp</i> | CCGAAAATCTGTGGGAAGTC     | CCAAGTGGGCAGTTTACCGTAAATAC | AAGGGAGCTGCAGTGGAGTA     |
| <i>Ryr2-gfp</i>            | ATATCACTCCTAGACATACCCTCA | CTTCAGCTCGATGCGGTTAC       | AGACCAGACAAGCCATCACACTA  |

| <b>qPCR primers</b> |                               |                           |
|---------------------|-------------------------------|---------------------------|
| <b>Gene</b>         | <b>primer1</b>                | <b>primer2</b>            |
| <i>Gapdh</i>        | GGATAAACCTGCCAACTATGATGAC     | GTAGCCAGGATGCCCTTTAGT     |
| <i>Cmya5 pair1</i>  | AAATGGACAAGGCACTGGAC          | CTCATCACTGCGCCAAAA        |
| <i>Cmya5 pair2</i>  | GTTAACCTCCCTCCCAACGACAATTACTT | CCGTCCCGTTCGCGGAGATCTGGAG |

| <b>gRNAs for CRISPR/Cas9 mutagenesis</b> |                      |                      |
|------------------------------------------|----------------------|----------------------|
| <b>Gene target</b>                       | <b>gRNA target 1</b> | <b>gRNA target 2</b> |
| <i>Cmya5</i>                             | GTTATCAGATGAGGATGAGG | CGAGGTTTCAGCACTCGACA |
| <i>Ryr2</i>                              | TGAGGTGGTTCTGCAGTGCA | TGCTGGCAGCAGAAGGATT  |
| <i>Myh6</i>                              | CAGGCACGAAGCACTCCGTG | CGCCAGATGGCTGACTTCG  |

**Supplementary Table 2. Antibodies used in this study**

| Antibody                                            | Source                                   | Catalog No. | Host species | Western Blotting dilution | Immunofluorescence dilution |
|-----------------------------------------------------|------------------------------------------|-------------|--------------|---------------------------|-----------------------------|
| CMYA5                                               | Dr. Francisco J. Naya, Boston University | -           | Rabbit       | 1:500                     | 1:100                       |
| RYR2                                                | Sigma-Aldrich                            | R128        | Mouse        | 1:500                     | 1:100                       |
| CAV3                                                | Life Technologies                        | PA1066      | Rabbit       | -                         | 1:100                       |
| CASQ2                                               | Abcam                                    | ab3516      | Rabbit       | 1:500                     | 1:100                       |
| JPH2                                                | Invitrogen                               | 40-5300     | Rabbit       | -                         | 1:100                       |
| FSD2                                                | Santa Cruz Biotechnology                 | sc-393072   | Mouse        | 1:500                     | 1:100                       |
| SAA                                                 | Sigma-Aldrich                            | A7811       | Mouse        | -                         | 1:100                       |
| BIN1                                                | Rockland Immunochemicals                 | 200-301-E63 | Mouse        | 1:500                     | -                           |
| GAPDH                                               | Proteintech                              | 60004-1-Ig  | Mouse        | 1:500                     | -                           |
| SERCA2a                                             | Invitrogen                               | MA3-919     | Mouse        | -                         | 1:100                       |
| HA tag                                              | Cell Signaling Technology                | 3724S       | Rabbit       | -                         | 1:100                       |
| HA tag                                              | BioLegend                                | 901513      | Mouse        | -                         | 1:100                       |
| MYH6                                                | Developmental Studies Hybridoma Bank     | A4.1025     | Mouse        | -                         | 1:100                       |
| NFAT3                                               | Santa Cruz Biotechnology                 | sc-1153     | Goat         | 1:500                     | -                           |
| Histone H3                                          | Abcam                                    | ab1791      | Rabbit       | 1:500                     | -                           |
| Titin                                               | Developmental Studies Hybridoma Bank     | 9D10        | Mouse        | -                         | 1:100                       |
| PKA                                                 | BD Biosciences                           | 612242      | Mouse        | -                         | 1:100                       |
| Streptavidin-Horseradish Peroxidase (HRP) Conjugate | Invitrogen                               | SA10001     | -            | 1:3000                    | -                           |
| Donkey-anti-Mouse HRP                               | Rockland Immunochemicals                 | 610-703-124 | -            | 1:3000                    | -                           |
| Donkey-anti-Rabbit HRP                              | Rockland Immunochemicals                 | 611-703-127 | -            | 1:3000                    | -                           |
| Donkey-anti-Mouse 488                               | Invitrogen                               | A32766      | -            | -                         | 1:200                       |
| Donkey-anti-Rabbit 488                              | Invitrogen                               | A32790      | -            | -                         | 1:200                       |
| Donkey-anti-Mouse 555                               | Invitrogen                               | A31570      | -            | -                         | 1:200                       |
| Donkey-anti-Rabbit 555                              | Invitrogen                               | A31572      | -            | -                         | 1:200                       |
| Donkey-anti-Mouse 647                               | Invitrogen                               | A31571      | -            | -                         | 1:200                       |
| Donkey-anti-Rabbit 647                              | Invitrogen                               | A31573      | -            | -                         | 1:200                       |
